# Supplementary material for: Comparison of the efficacy and safety of FP-1201-lyo (intravenously administered recombinant human interferon beta-1a) and placebo in the treatment of patients with moderate or severe acute respiratory distress syndrome: study protocol for a randomized controlled trial
Source: PubMed Central journal article supplement (PMC5683224; doi:10.1186/s13063-017-2234-7), 2017-11-13
Supplement: 13063_2017_2234_MOESM2_ESM.pdf [file 13063_2017_2234_MOESM2_ESM.pdf]

| Country | Site Name                                       | Ethics Committee Name                                                       | Approval Reference Number                               | Date EC Approval Received |
|---------|-------------------------------------------------|-----------------------------------------------------------------------------|---------------------------------------------------------|---------------------------|
| Belgium | Erasme Hospital                                 | Erasme-ULB ( Hospital) Ethics Committee                                     | Erasme Reference -P2015/338, EudraCT No:2014-005260-15  | 30-nov-15                 |
| Belgium | CHU Charleroi<br>Site Hôpital Civil Marie Curie | Erasme-ULB( Hospital ) Ethics Committee                                     | Erasme Reference -P2015/338, EudraCT No:2014-005260-15  | 30-nov-15                 |
| Belgium | Centre Hospitalier<br>Universitaire de Liège    | Erasme-ULB( Hospital ) Ethics Committee                                     | Erasme Reference -P2015/338, EudraCT No:2014-005260-15  | 30-nov-15                 |
| Belgium | UZ Gent, Oost-Vlaanderen                        | Erasme-ULB( Hospital ) Ethics Committee                                     | Erasme Reference -P2015/338, EudraCT No:2014-005260-15  | 30-nov-15                 |
| Belgium | CHU Dinant Godinne UCL<br>Namur                 | Erasme-ULB( Hospital ) Ethics Committee                                     | Erasme Reference -P2015/338, EudraCT No:2014-005260-15  | 30-nov-15                 |
| Belgium | UZ Antwerpen                                    | Erasme-ULB( Hospital ) Ethics Committee                                     | Erasme Reference -P2015/338, EudraCT No:2014-005260-15  | 30-nov-15                 |
| Belgium | UZ Brussel                                      | Erasme-ULB( Hospital ) Ethics Committee                                     | Erasme Reference -P2015/338, EudraCT No:2014-005260-15  | 30-nov-15                 |
| Finland | Helsinki University Hospital                    | Hospital District of Helsinki and<br>UUSIMAA(HUS) Research EC, Dept Surgery | Dnro 255/13/03/02/15                                    | 23-sept-15                |
| Finland | Tampere University<br>Hospital                  | Hospital District of Helsinki and<br>UUSIMAA(HUS) Research EC, Dept Surgery | HUS/1376/2016                                           | 23-sept-15                |
| Finland | Kuopio University Hospital                      | Hospital District of Helsinki and<br>UUSIMAA(HUS) Research EC, Dept Surgery | HUS/1376/2016                                           | 23-sept-15                |
| Finland | Turku University Central<br>Hospital            | Hospital District of Helsinki and<br>UUSIMAA(HUS) Research EC, Dept Surgery | HUS/1376/2016                                           | 28-sept-16                |
| France  | CHU D'Angers, Pay-de-la-<br>loire               | Ouest II EC -Angers                                                         | RCB No.- 2014-005266-15,EC Identification No<br>2015/24 | 26-nov-15                 |
| France  | Hôpital Charles-Nicolle,<br>Seine-Maritime      | Ouest II EC -Angers                                                         | RCB No.- 2014-005266-15,EC Identification No<br>2015/24 | 26-nov-15                 |

|         |                                                                                 |                                             |                                                      |            |
|---------|---------------------------------------------------------------------------------|---------------------------------------------|------------------------------------------------------|------------|
| France  | Centre Hospitalier Régional d'Orléans, Orléans cedex 2                          | Ouest II EC -Angers                         | RCB No.- 2014-005266-15,EC Identification No 2015/24 | 26-nov-15  |
| France  | Chu De Poitiers, Poitou-Charentes                                               | Ouest II EC -Angers                         | RCB No.- 2014-005266-15,EC Identification No 2015/24 | 26-nov-15  |
| France  | Hôpital Cochin, Réanimation Médicale Hospitalisation, Île-de-France             | Ouest II EC -Angers                         | RCB No.- 2014-005266-15,EC Identification No 2015/24 | 26-nov-15  |
| France  | Pitié-Salpêtrière Hospital, Paris                                               | Ouest II EC -Angers                         | RCB No.- 2014-005266-15,EC Identification No 2015/24 | 26-nov-15  |
| France  | Hôpital de la Croix Rousse, Rhône                                               | Ouest II EC -Angers                         | RCB No.- 2014-005266-15,EC Identification No 2015/24 | 26-nov-15  |
| France  | Nouvel Hôpital Civil, Alsace                                                    | Ouest II EC -Angers                         | RCB No.- 2014-005266-15,EC Identification No 2015/24 | 26-nov-15  |
| France  | Centre Hospitalier Universitaire de Bicêtre, Ile-de-France                      | Ouest II EC -Angers                         | RCB No.- 2014-005266-15,EC Identification No 2015/24 | 26-nov-15  |
| France  | Hopital Nord de Marseille                                                       | Ouest II EC -Angers                         | RCB No.- 2014-005266-15,EC Identification No 2015/24 | 21-juin-16 |
| France  | CHU de la Cavale Blanche, Bretagne                                              | Ouest II EC -Angers                         | RCB No.- 2014-005266-15,EC Identification No 2015/24 | 21-juin-16 |
| France  | CHU Bretonneau, Centre Val de Loire                                             | Ouest II EC -Angers                         | RCB No.- 2014-005266-15,EC Identification No 2015/24 | 21-juin-16 |
| Germany | Universitätsmedizin Göttingen<br>Klinik für Anästhesiologie,Göttingen           | EC UMG, University Medical Centre Gottingen | EC Ref Number: 33/8/15                               | 5-févr-16  |
| Germany | Klinikum Augsburg<br>Klinik für Anästhesiologie,Bayern                          | EC UMG, University Medical Centre Gottingen | EC Ref Number: 33/8/15                               | 5-févr-16  |
| Germany | Kliniken der Stadt Köln<br>Klinikum Merheim<br>Lungenklinik,Nordrhein-Westfalen | EC UMG, University Medical Centre Gottingen | EC Ref Number: 33/8/15                               | 5-févr-16  |
| Germany | University Medical Center Hamburg-Eppendorf, Hamburg                            | EC UMG, University Medical Centre Gottingen | EC Ref Number: 33/8/15                               | 5-févr-16  |

|         |                                                                                                                                                                                        |                                                   |                        |            |
|---------|----------------------------------------------------------------------------------------------------------------------------------------------------------------------------------------|---------------------------------------------------|------------------------|------------|
| Germany | Universitätsklinikum Leipzig, Sachsen                                                                                                                                                  | EC UMG, University Medical Centre Gottingen       | EC Ref Number: 33/8/15 | 5-févr-16  |
| Germany | Universitätsklinikum Bonn Klinik und Poliklinik für Anästhesiologie, Nordrhein-Westfalen                                                                                               | EC UMG, University Medical Centre Gottingen       | EC Ref Number: 33/8/15 | 5-févr-16  |
| Germany | Universitätsklinikum Carl Gustav Carus Dresden, Sachsen                                                                                                                                | EC UMG, University Medical Centre Gottingen       | EC Ref Number: 33/8/15 | 5-févr-16  |
| Germany | Charite-Universitätsmedizin Berlin                                                                                                                                                     | EC UMG, University Medical Centre Gottingen       | EC Ref Number: 33/8/15 | 9-août-16  |
| Italy   | Giacomo Bellani, Università degli Studi Milano Bicocca, Dipartimento di Medicina e Chirurgia A.O. San Gerardo, Dipartimento di Emergenza e Urgenza Via Pergolesi 33, Monza (MB), Italy | Ethics Committee of the Province of Monza Brianza | EC Ref 2147            | 14-oct-15  |
| Italy   | Fondazione Policlinico Universitario Agostino Gemelli                                                                                                                                  | Ethics Committee Fondazione Pol. Univ A Gemelli   | EC Ref no 2901/16      | 7-avr-16   |
| Italy   | Azienda Ospedaliera Universitaria Maggiore della Carità                                                                                                                                | Ethics Committee Clinic Corso Novara              | EC Ref no 164/15       | 7-avr-16   |
| Italy   | AOU Città della Salute e della Scienza di Torino                                                                                                                                       | Ethics Committee of Torino                        | EC Ref no:2147         | 11-juil-16 |
| Italy   | Universita degli Studi di Roma "La Sapienza" Roma                                                                                                                                      | Ethics Committee Pol Umberto                      | EC Ref no 69/16        | 29-mars-16 |

|       |                                                                                                                                                                                              |                                                  |                    |            |
|-------|----------------------------------------------------------------------------------------------------------------------------------------------------------------------------------------------|--------------------------------------------------|--------------------|------------|
| Italy | Unità Operativa Rianimazione Generale "Emma Vecla", Dipartimento di Anestesia, Rianimazione ed Emergenza Urgenza, IRCCS Ospedale Maggiore Policlinico, Via Francesco Sforza 28, 20122 Milano | Ethics Committee Milano Area B                   | EC Ref 176_2016    | 12-avr-16  |
| Italy | Azienda Ospedaliera Universitaria Sant'Anna, Ferrara                                                                                                                                         | Ethics Committee Della Province Di Ferrara       | EC Ref 160899,     | 13-oct-16  |
| Spain | Hospital de la Santa Creu i Sant Pau, Barcelona                                                                                                                                              | EC Fundacio de Gestio Sanitaria, Hosp Santa Creu | EC Ref 15/235 ( r) | 10-févr-16 |
| Spain | Corporació Sanitària Parc Taulí, Barcelona                                                                                                                                                   | EC Fundacio de Gestio Sanitaria, Hosp Santa Creu | EC Ref 15/235 ( r) | 10-févr-16 |
| Spain | Hospital Clínic i Provincial de Barcelona                                                                                                                                                    | EC Fundacio de Gestio Sanitaria, Hosp Santa Creu | EC Ref 15/235 ( r) | 10-févr-16 |
| Spain | Hospital Universitario Rio Hortega, Valladolid                                                                                                                                               | EC Fundacio de Gestio Sanitaria, Hosp Santa Creu | EC Ref 15/235 ( r) | 10-févr-16 |
| Spain | Hospital Universitari Vall d'Hebron, Barcelona                                                                                                                                               | EC Fundacio de Gestio Sanitaria, Hosp Santa Creu | EC Ref 15/235 ( r) | 10-févr-16 |
| Spain | Hospital Universitari Son Espases, Balears                                                                                                                                                   | EC Fundacio de Gestio Sanitaria, Hosp Santa Creu | EC Ref 15/235 ( r) | 10-févr-16 |
| Spain | Hospital Universitario del Henares, Comunidad de Madrid                                                                                                                                      | EC Fundacio de Gestio Sanitaria, Hosp Santa Creu | EC Ref 15/235 ( r) | 10-févr-16 |
| Spain | Hospital Universitario de Getafe                                                                                                                                                             | EC Fundacio de Gestio Sanitaria, Hosp Santa Creu | EC Ref 15/235 ( r) | 10-févr-16 |
| Spain | Hospital Universitari Mútua de Terrassa                                                                                                                                                      | EC Fundacio de Gestio Sanitaria, Hosp Santa Creu | EC Ref 15/235 ( r) | 10-févr-16 |
| Spain | Hospital Universitario de Gran Canaria Dr Negrin                                                                                                                                             | EC Fundacio de Gestio Sanitaria, Hosp Santa Creu | EC Ref 15/235 ( r) | 10-févr-16 |

|                |                                                                                                                            |                                            |                                   |           |
|----------------|----------------------------------------------------------------------------------------------------------------------------|--------------------------------------------|-----------------------------------|-----------|
| United Kingdom | University College London Hospitals, NHS Foundation Trust                                                                  | London - Hamstead Research Ethic Committee | EC Ref 15/LO/2098, IRAS ID 182147 | 23-déc-15 |
| United Kingdom | Guy's and St Thomas' NHS Foundation Trust, Adult Intensive Care Unit, First floor, East Wing                               | London - Hamstead Research Ethic Committee | EC Ref 15/LO/2098, IRAS ID 182147 | 23-déc-15 |
| United Kingdom | St George's Hospital GICU 1st Floor St James Wing                                                                          | London - Hamstead Research Ethic Committee | EC Ref 15/LO/2098, IRAS ID 182147 | 23-déc-15 |
| United Kingdom | Southampton General Hospital / University Hospital Southampton NHS Foundation Trust                                        | London - Hamstead Research Ethic Committee | EC Ref 15/LO/2098, IRAS ID 182147 | 23-déc-15 |
| United Kingdom | Critical Care Research Office, Golden Jubilee Wing, King's College Hospital / King's College Hospital NHS Foundation Trust | London - Hamstead Research Ethic Committee | EC Ref 15/LO/2098, IRAS ID 182147 | 23-déc-15 |
| United Kingdom | Queen Alexandra Hospital / Portsmouth Hospitals NHS Trust                                                                  | London - Hamstead Research Ethic Committee | EC Ref 15/LO/2098, IRAS ID 182147 | 23-déc-15 |
| United Kingdom | Bristol Royal Infirmary/University Hospitals Bristol Foundation Trust                                                      | London - Hamstead Research Ethic Committee | EC Ref 15/LO/2098, IRAS ID 182147 | 23-déc-15 |
| United Kingdom | St Mary's Hospital, Imperial College Healthcare NHS Trust,                                                                 | London - Hamstead Research Ethic Committee | EC Ref 15/LO/2098, IRAS ID 182147 | 23-déc-15 |
| United Kingdom | Charing Cross Hospital/Imperial College Healthcare Fulham Palace Road London W6 8RF                                        | London - Hamstead Research Ethic Committee | EC Ref 15/LO/2098, IRAS ID 182147 | 23-déc-15 |
| United Kingdom | Charing Cross Hospital/Imperial College Healthcare NHS Trust                                                               | London - Hamstead Research Ethic Committee | EC Ref 15/LO/2098, IRAS ID 182147 | 23-déc-15 |
| United Kingdom | Royal Infirmary of Edinburgh, ICU Research Office, Chancellor Building                                                     | London - Hamstead Research Ethic Committee | EC Ref 15/LO/2098, IRAS ID 182147 | 23-déc-15 |

|                |                                                                                             |                           |                                   |             |
|----------------|---------------------------------------------------------------------------------------------|---------------------------|-----------------------------------|-------------|
| United Kingdom | Nottingham University Hospitals NHS Trust, DREEM, Emergency Department, West Block, A Floor | Health Research Authority | EC Ref 15/LO/2098, IRAS ID 182147 | 05 Oct 2016 |
| United Kingdom | Norfolk & Norwich Foundation Trust University Hospital                                      | Health Research Authority | EC Ref 15/LO/2098, IRAS ID 182147 | 12 Dec 2016 |
| United Kingdom | Lancashire Teaching Hospitals NHS Foundation Trust                                          | Health Research Authority | EC Ref 15/LO/2098, IRAS ID 182147 | 21 Dec 2016 |
